# Supplementary material for: Stability improvement of Cu(ii)-doped ZnS/ZnO photodetectors prepared with a facile solution-processing method
Source: Royal Society of Chemistry journal article supplement (doi:10.1039/d0qi00937g), 2020-11-12
Supplement: d0qi00937g1.pdf [file d0qi00937g1.pdf]

## Electronic Supplementary Information

### Stability improvement of Cu(II) doped ZnS/ZnO photodetectors prepared with facile solution-processing method

Po-Hsuan Hsiao,<sup>a</sup> Ta-Cheng Wei,<sup>a</sup> and Chia-Yun Chen<sup>a,b\*</sup>

<sup>a</sup>Department of Materials Science and Engineering, National Cheng Kung University, Tainan 70101, Taiwan

<sup>b</sup>Hierarchical Green-Energy Materials (Hi-GEM) Research Center, National Cheng Kung University, Tainan

#### S1 Microstructural and compositional investigations of prepared samples

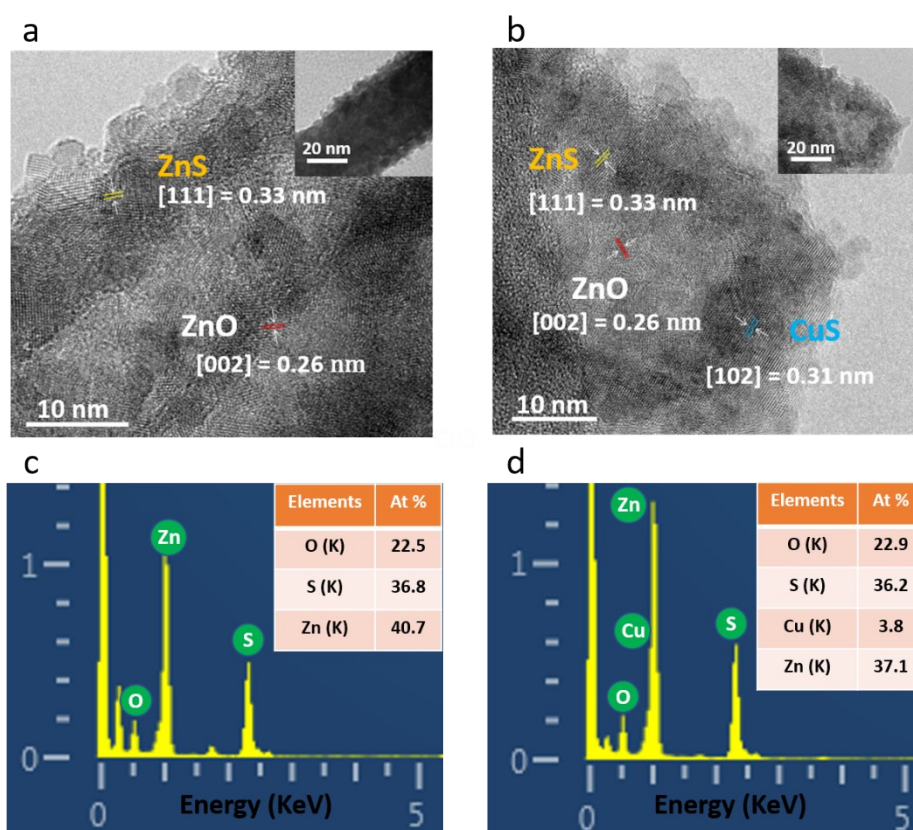

Figure S1 HRTEM images of a (a) ZnS/ZnO nanorod and (b) Cu<sup>2+</sup> doped ZnS/ZnO nanorod. The inserted figures showed the corresponding TEM images, respectively. No voids could be observed at inner ZnO nanorods. EDS results of a (a) ZnS/ZnO nanorod and (b) Cu<sup>2+</sup> doped ZnS/ZnO nanorod. The inserted tables presented the corresponding quantitative elemental compositions, respectively.

## S2 Long-term surface wettability of ZnO-based structures

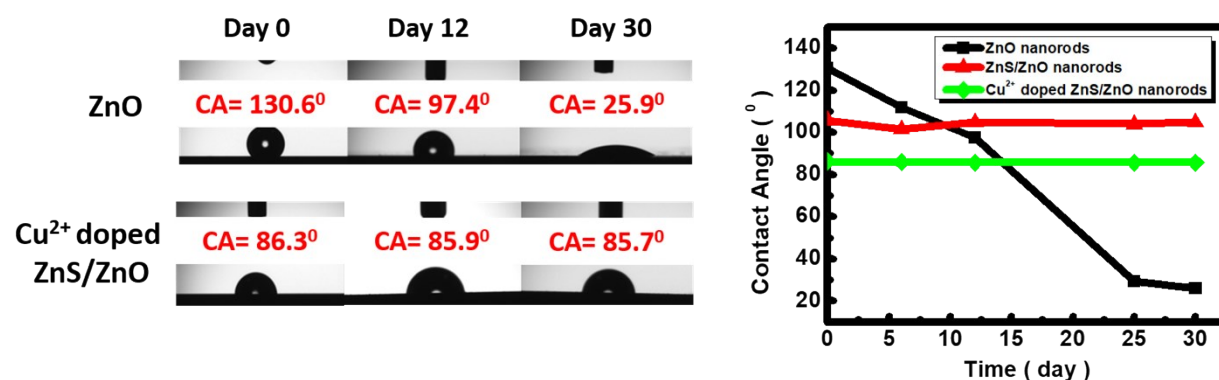

Figure S2 Contact-angle measurements of three various samples. The results indicated the highly unstable wettability of ZnO from time to time, whereas the contact angles stayed the same for long-term measurements in Cu<sup>2+</sup> doped ZnS/ZnO.

## S3 Measured photocurrent enhancement of sole ZnO based photodetectors

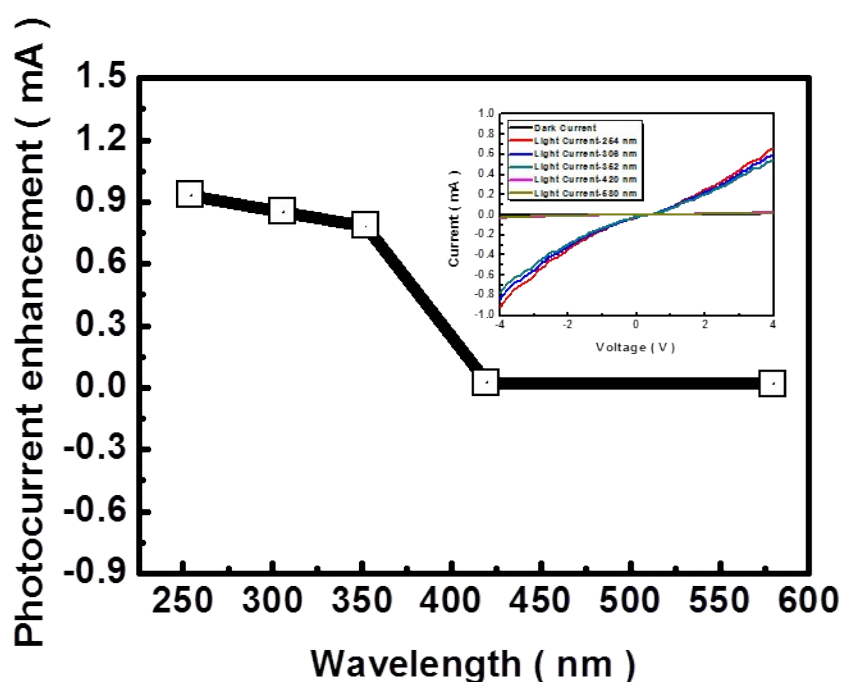

Figure S3 Photocurrent enhancement of sole ZnO based photodetectors. The inserted figures presented the measured current-voltage curves under light illuminations of various wavelengths, respectively.

# S4 On/off switch diagrams under light illuminations of 365 nm

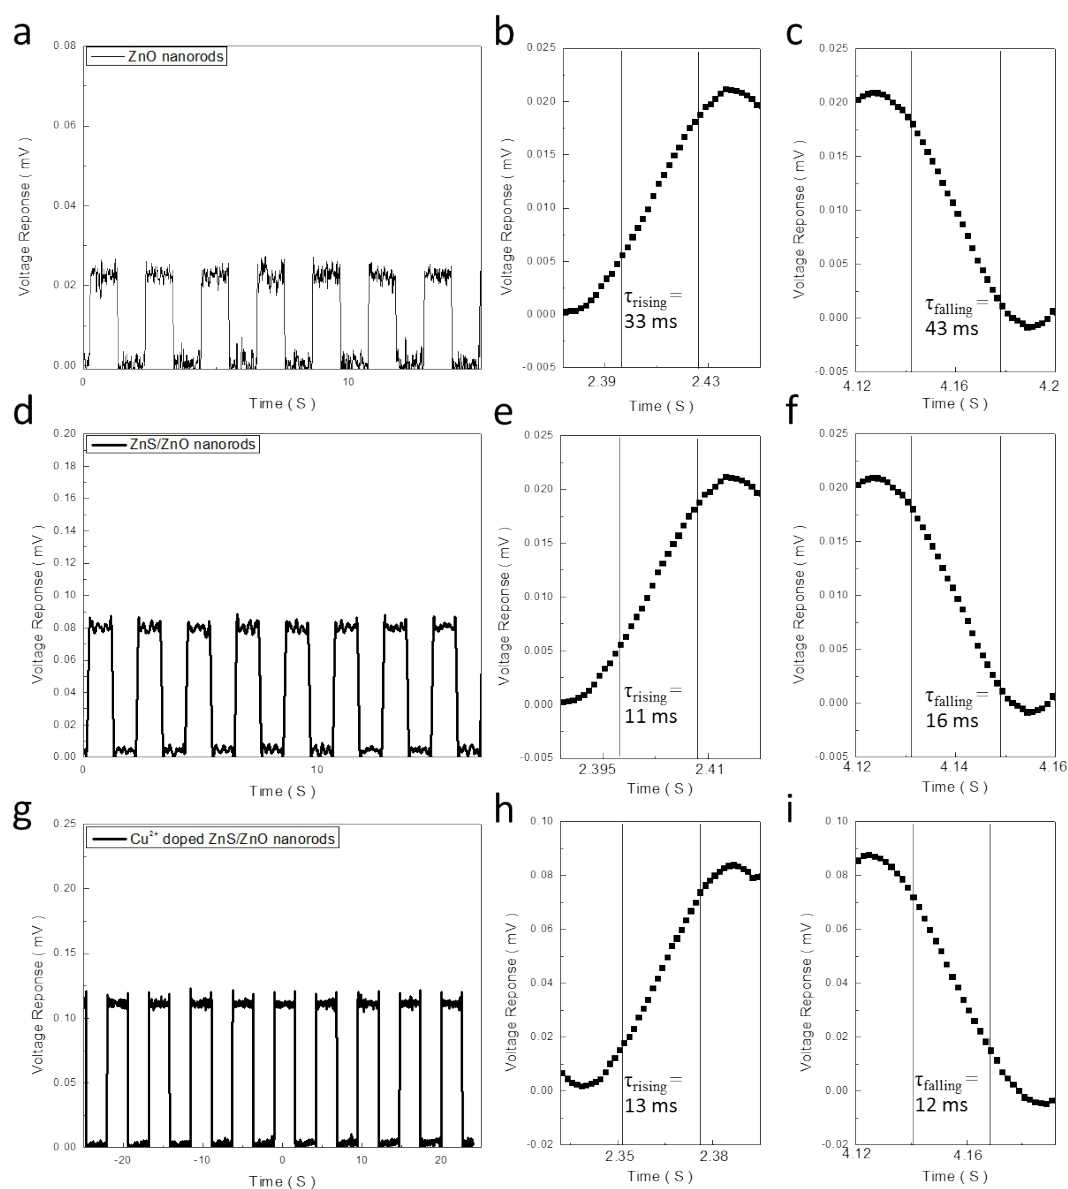

Figure S4 The on/off switch diagrams of (a)-(c) ZnO nanorods, (d)-(f) ZnS/ZnO nanorods and (g)-(i)  $\text{Cu}^{2+}$  doped ZnS/ZnO nanorods under 365-nm illumination, respectively.

## S5 Long-term cycling test of Cu<sup>2+</sup> doped ZnS/ZnO-based photodetectors

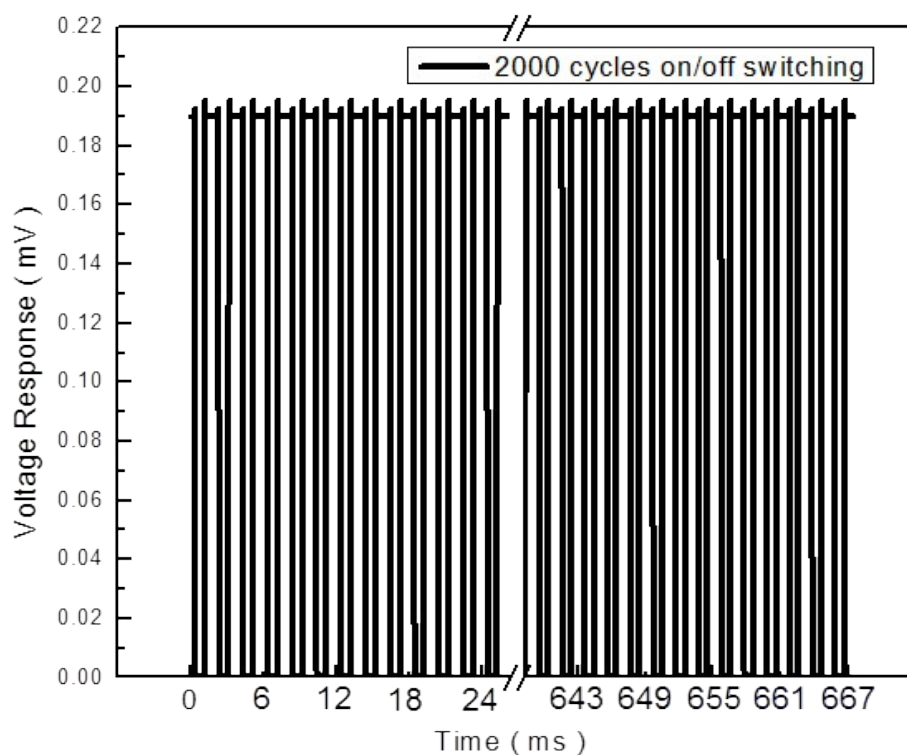

Figure S5 Cycling test of Cu<sup>2+</sup> doped ZnS/ZnO-based photodetectors.

## S6 Responsivity and EQE examinations

Table S1 Device responsivity and EQE results

|                                         | Responsivity (A/W @ 4 V) | EQE (%) |
|-----------------------------------------|--------------------------|---------|
| Light sources : 365nm                   |                          |         |
| ZnO nanorods                            | 0.37                     | 126     |
| ZnO/ZnS nanorods                        | 0.48                     | 163     |
| Cu <sup>2+</sup> doped ZnS/ZnO nanorods | 0.57                     | 193     |
| Light sources : 420nm                   |                          |         |
| ZnO nanorods                            | 0.23                     | 68      |
| ZnO/ZnS nanorods                        | 0.49                     | 145     |

The responsivity and EQE of devices were evaluated by the following equations,

$$R = I_{\text{photocurrent}} / P_{\text{power of light}}$$

$$EQE = R \times (hc/e\lambda)$$

where  $I_{\text{photocurrent}}$  was photocurrent enhancement,  $P_{\text{power of light}}$  was power of light source,  $h$  was Plank constant,  $C$  indicated the light velocity,  $\lambda$  was the excited wavelength and  $e$  indicated the electronic charge.<sup>1</sup>

#### S7 Thermal stability test

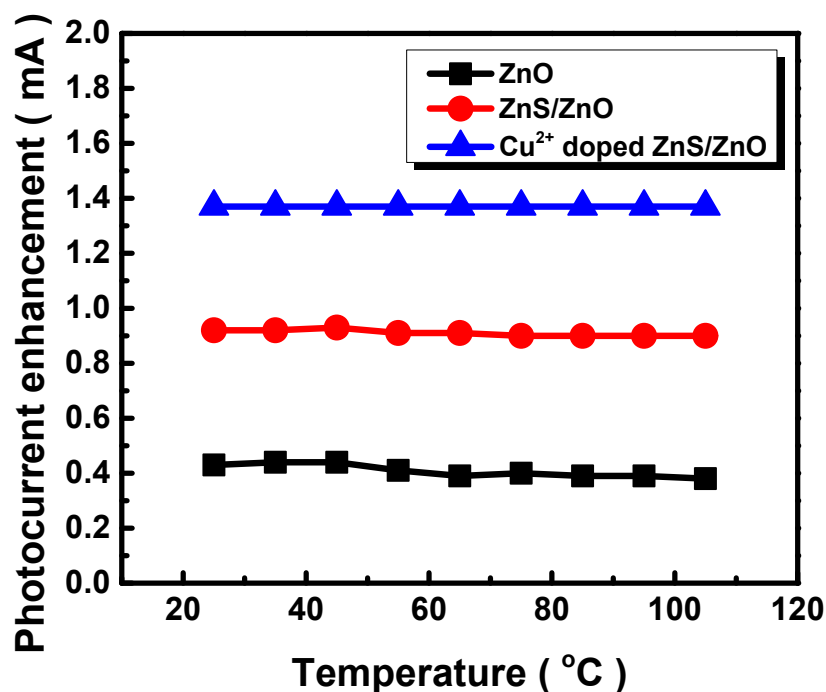

Figure S6 Thermal stability test of various ZnO-based photodetectors.

#### S8 Comparisons of ZnO-based photodetectors

Table S2 Comparative table of the ZnO-based photodetectors

|                                                     | Range of<br>detection | Bias<br>(V) | Responsivity<br>(A/W) | Detectivity<br>( $10^{-12}$<br>$\text{cmHz}^{-1/2}\text{W}^{-1}$ ) | $\tau_{\text{Rise}}/\tau_{\text{Decay}}$ | $I_{\text{On}}/I_{\text{Off}}$<br>ratio | Reference        |
|-----------------------------------------------------|-----------------------|-------------|-----------------------|--------------------------------------------------------------------|------------------------------------------|-----------------------------------------|------------------|
| Fe doped<br>ZnO/ZnO core-<br>shell nanorods         | 350-365 nm            | 8           | 3.66                  | NA                                                                 | 22 s/ >1200<br>s                         | >100                                    | 2                |
| ZnO NW-Co <sub>3</sub> O <sub>4</sub>               | Visible               | 0.1         | 0.022                 | 4.12                                                               | 6 s/NA                                   | NA                                      | 3                |
| ZnO/Cu <sub>2</sub> O Core-<br>shell nanowires      | UV                    | 0           | $7.67 \times 10^{-6}$ | NA                                                                 | <90 ms/<90<br>ms                         | NA                                      | 4                |
| Branched<br>ZnS-ZnO<br>Heterostructure<br>Nanofilms | UV                    | 10          | $1.6 \times 10^{-7}$  | NA                                                                 | 0.77 s/0.73<br>s                         | 6.21                                    | 5                |
| Type-II ZnO/ZnS<br>Core/Shell<br>Nanowire Array     | Visible               | 1.5         | 0.54                  | NA                                                                 | NA                                       | 4.25                                    | 6                |
| Cu <sup>2+</sup> doped<br>ZnS/ZnO<br>nanorods       | 254-580 nm            | 4           | 0.73                  | 127.2                                                              | 17 ms/19<br>ms                           | 22800.0                                 | <b>This work</b> |

## Reference

1. A. Janotti and C. G. Van de Walle, Oxygen vacancies in ZnO, *Appl. Phys. Lett.*, 2005, **87**(12), 122102.
2. R. Azimirad, A. Khayatian, S. Safa and M. Almasi Kashi, Enhancing photoresponsivity of ultra violet photodetectors based on Fe doped ZnO/ZnO shell/core nanorods, *J. Alloys Compd.*, 2014, **615**, 227-233.
3. P. Ghamgosar, F. Rigoni, M. G. Kohan, S. You, E. A. Morales, R. Mazzaro, V. Morandi, N. Almqvist, I. Concina and A. Vomiero, Self-Powered Photodetectors Based on Core-Shell ZnO-Co<sub>3</sub>O<sub>4</sub> Nanowire Heterojunctions, *ACS Appl. Mater. Interfaces.*, 2019, **11**, 23454-23462.
4. P. Ghamgosar, F. Rigoni, S. You, I. Dobryden, M. G. Kohan, A. L. Pellegrino, I. Concina, N. Almqvist, G. Malandrino and A. Vomiero, ZnO-Cu<sub>2</sub>O core-shell nanowires as stable and fast response photodetectors, *Nano Energy.*, 2018, **51**, 308-316.

5. W. Tian, C. Zhang, T. Zhai, S. L. Li, X. Wang, J. Liu, X. Jie, D. Liu, M. Liao and Y. Koide, Flexible ultraviolet photodetectors with broad photoresponse based on branched ZnS-ZnO heterostructure nanofilms, *Adv. Mater.*, 2014, **26**, 3088-3093.
6. S. C. Rai, K. Wang, Y. Ding, J. K. Marmon, M. Bhatt, Y. Zhang, W. Zhou and Z. L. Wang, Piezo-phototronic effect enhanced UV/visible photodetector based on fully wide band gap type-II ZnO/ZnS core/shell nanowire array, *ACS nano*, 2015, **9**, 6419-6427.
